# Supplementary material for: Chronic delta-9-tetrahydrocannabinol (THC) treatment counteracts SIV-induced modulation of proinflammatory microRNA cargo in basal ganglia-derived extracellular vesicles
Source: J Neuroinflammation. 2022 Sep 12;19:225. doi: 10.1186/s12974-022-02586-9 (PMC9469539; doi:10.1186/s12974-022-02586-9)
Supplement: Supplementary file 2 — Additional file 2: Raw counts of BE-EV miRNA. [file 12974_2022_2586_MOESM2_ESM.xlsx]

## Sheet: Sheet1
Supplemental Table 1. BG-EVs miRNA raw counts
	SIV-THC-			SIV+THC-			SIV+THC+
	IR97_EVs	IT18_EVs	GT18_EVs	IV95_EVs	JD66_EVs	JR36_EVs	JI45_EVs	JC85_EVs	IV90_EVs
miRs	RSB349-1	RSB349-2	RSB349-3	RSB349-4	RSB349-5	RSB349-6	RSB349-7	RSB349-8	RSB349-9
mml-miR-191-5p	33307	120482	70774	6884	24995	15350	143019	22580	98954
mml-miR-26a-5p	21273	223054	163766	10250	36615	24767	220092	37532	161485
mml-let-7a-5p	15780	1187594	652509	37864	108362	79194	976645	220334	530763
mml-let-7c-5p	15754	1187069	651609	37854	108204	79123	976051	220244	530393
mml-miR-151-5p	13604	93082	100926	5499	23184	10633	67164	20016	69868
mml-let-7b-5p	9868	477465	313855	38908	98171	49362	354164	138772	263559
mml-miR-125b-5p	8795	13662	11851	764	5270	1163	19170	2536	7882
mml-miR-139-5p	5978	14530	11120	1249	7973	6268	29577	1226	27822
mml-miR-132-3p	5621	20053	9016	663	3939	2443	23451	2305	11671
mml-miR-29b-3p	5580	76627	53982	5111	19340	15008	97555	20419	61095
mml-miR-27a-3p	4853	15745	10790	887	4119	1913	15092	3043	11385
mml-miR-376c-3p	4757	16148	12804	1582	7353	4783	19401	4309	17479
mml-miR-181a-5p	4721	42372	52078	2361	24346	5793	26594	10190	29262
mml-miR-27b-3p	4600	15213	10404	846	4026	1844	14445	2874	10901
mml-miR-29c-3p	3936	61947	43590	4108	15578	12544	79793	17275	48588
mml-miR-9-3p	3715	20126	14502	1525	4408	2477	29548	4236	20293
mml-let-7g-5p	3703	175524	97995	6300	19199	14873	180776	29796	98241
mml-miR-9-3-3p	3150	15513	10723	1295	3379	1867	21715	3483	14542
mml-let-7f-5p	2983	254002	144206	8297	16085	17171	212830	48242	118920
mml-miR-9-5p	2704	16526	14291	913	4756	2950	28328	2712	10440
mml-miR-185-5p	2638	27060	27997	2326	10581	4279	29188	8484	19644
mml-miR-335-5p	2439	24844	15611	1870	2086	2193	21868	4222	12470
mml-miR-137-3p	2278	13770	7549	672	1675	1270	17306	559	9191
mml-miR-95-3p	2046	7566	4555	725	1932	1665	8849	890	10538
mml-miR-181b-5p	2003	36082	35234	2453	16372	4900	21789	10116	28030
mml-miR-16-5p	1812	18363	18842	1545	7985	3102	17929	4252	24023
mml-miR-125a-5p	1792	2536	2235	165	1075	438	3754	722	1482
mml-miR-99a-5p	1698	20830	14455	1980	4457	1782	27666	5421	15084
mml-let-7e-5p	1568	82635	40603	2876	8923	8777	79673	24397	43674
mml-miR-29a-3p	1491	21443	15937	2161	6319	4245	28870	7265	17927
mml-let-7i-5p	1370	57963	35517	5077	7963	5542	60820	17569	42164
mml-miR-411-5p	1318	7995	4514	655	1776	1870	9286	2351	6579
mml-miR-7	1269	14908	9420	1843	1197	706	16839	2289	7360
mml-miR-338-3p	1097	14676	16648	548	5757	1679	6941	3986	8111
mml-miR-100-5p	1067	16983	17086	2014	5845	1613	9990	5653	7251
mml-miR-138-5p	1036	8821	5901	962	9311	4751	16164	2740	16392
mml-miR-22	992	4194	2922	362	2011	678	6289	1221	5377
mml-miR-320a	974	5961	5660	941	1112	676	6237	2247	3775
mml-miR-320b	972	5958	5655	940	1108	675	6226	2246	3773
mml-miR-361-5p	909	1900	1820	155	684	384	2763	454	3239
mml-miR-17-5p	845	9159	7255	396	1695	817	7368	1204	6092
mml-miR-107-3p	837	7387	5823	395	3444	1779	13698	1515	11037
mml-miR-103-3p	836	7390	5826	395	3445	1779	13699	1515	11038
mml-miR-26b-5p	834	29667	20160	2059	3587	2714	14522	9297	11256
mml-miR-124a-3p	760	19804	15007	1811	11084	4887	41387	7574	20176
mml-miR-376b-3p	745	4113	3752	490	2263	1314	6786	1003	5207
mml-miR-376a-3p	737	4081	3711	484	2261	1324	6732	982	5132
mml-let-7d	682	49878	29572	1478	5622	4732	54253	10185	38234
mml-miR-28-3p	660	3814	3719	321	1085	482	4009	923	3135
mml-miR-324-5p	636	2360	1605	307	724	460	4327	613	3304
mml-miR-433-3p	631	1301	847	137	482	297	2711	304	1849
mml-miR-432-5p	567	3988	2098	381	342	324	5114	1066	3619
mml-miR-421	556	2968	1820	194	788	263	2840	478	2435
mml-miR-23a-3p	507	2296	2180	156	2039	619	3558	636	2864
mml-miR-23b-3p	505	2313	2210	156	2055	618	3583	635	2868
mml-miR-30a-3p	502	2768	2193	210	524	524	2996	1031	2446
mml-miR-488-3p	502	3034	2485	143	490	323	2898	337	1659
mml-miR-221-3p	470	4727	2282	458	1746	1146	9602	745	6709
mml-miR-143-3p	447	13074	8420	1641	3195	4422	42978	7763	12386
mml-miR-145-5p	432	1264	2094	252	2372	1248	8314	1012	2017
mml-miR-146a-5p	387	9055	4966	808	930	810	9113	1887	7419
mml-miR-146b-5p	380	9004	4904	795	900	788	9023	1863	7340
mml-miR-186-5p	355	1559	1195	105	488	204	1601	300	1464
mml-miR-342-3p	318	910	683	53	566	303	1210	257	1408
mml-miR-106b-5p	316	3863	3394	224	1125	563	3530	550	2852
mml-miR-181a-3p	294	2415	1910	121	914	296	2193	490	1331
mml-miR-98	290	19462	9946	1123	1795	1519	18662	3928	10428
mml-miR-128a-3p	289	358	366	74	372	125	1119	85	584
mml-miR-30d-5p	272	1212	1656	136	1014	399	3979	251	2543
mml-miR-126	267	1126	735	87	420	253	2863	422	1483
mml-miR-598-3p	267	1291	1071	55	441	245	1603	169	2193
mml-miR-1180-3p	254	529	331	60	121	36	495	72	809
mml-miR-99b-5p	242	1413	1182	111	776	305	1947	368	1847
mml-miR-222-3p	242	1582	910	243	457	328	3312	261	2856
mml-miR-330-3p	236	862	736	51	594	144	1322	174	1260
mml-miR-140-5p	225	2716	3553	220	1671	792	4472	701	2375
mml-miR-382-5p	224	5138	3126	484	1650	884	8713	1607	4621
mml-miR-128b-3p	223	266	266	70	295	103	913	59	468
mml-miR-369-5p	211	683	365	61	151	109	935	198	813
mml-miR-361-3p	211	392	298	24	136	54	697	85	547
mml-miR-423-5p	204	1982	1680	225	445	276	1795	846	1405
mml-miR-219-3p	179	1334	2100	76	866	224	862	376	1147
mml-miR-338-5p	174	1903	2125	87	850	191	1029	314	1443
mml-miR-370-3p	162	918	309	88	442	61	2027	228	1095
mml-miR-140-3p	160	184	198	35	277	88	374	73	295
mml-miR-323b-3p	154	228	186	21	153	56	518	49	264
mml-miR-454-3p	153	13262	9889	386	1975	1489	9598	3626	7043
mml-miR-331-3p	147	1261	674	32	207	61	2397	120	1008
mml-miR-21-5p	137	5735	6733	627	2256	890	4241	1511	3694
mml-miR-129-5p	136	636	334	57	93	97	826	118	657
mml-miR-6529-5p	133	4140	2623	283	900	596	4139	1001	2628
mml-miR-484	132	501	922	50	1374	319	1712	151	645
mml-miR-30a-5p	130	728	936	106	460	355	1952	245	1201
mml-miR-101-3p	114	1413	1170	75	428	177	1261	249	881
mml-miR-487b-3p	104	808	969	72	709	308	2867	166	1609
mml-miR-323a-3p	104	295	193	18	151	47	859	49	484
mml-miR-660-5p	96	669	278	106	179	70	382	373	462
mml-miR-127-3p	95	4158	3360	706	3985	1761	7359	2783	5418
mml-miR-30c-5p	95	464	532	30	313	149	1089	137	1003
mml-miR-129-1-3p	86	866	475	110	717	322	1882	162	1330
mml-miR-24-3p	82	1038	706	77	379	238	1753	352	935
mml-miR-889-3p	81	439	260	36	82	111	462	101	282
mml-miR-628-5p	79	301	136	13	79	42	266	31	198
mml-miR-489-3p	76	137	1185	219	186	5	289	93	347
mml-miR-20a-5p	75	1023	1286	84	382	179	682	251	729
mml-miR-197-3p	75	55	51	4	29	7	72	16	51
mml-miR-767-5p	73	238	118	10	15	12	464	34	177
mml-miR-381-3p	72	117	90	9	58	33	205	23	208
mml-miR-885-5p	70	74	64	12	70	29	134	34	87
mml-miR-181d	65	1686	954	147	266	120	2344	563	770
mml-miR-195-5p	64	994	672	60	169	77	755	229	715
mml-miR-149-5p	63	688	667	43	409	89	1512	224	922
mml-miR-708-5p	63	3903	2710	349	2573	1506	5963	720	5008
mml-miR-34c-5p	63	14	56	486	35	4	68	3	21
mml-miR-885-3p	62	498	191	32	123	91	687	126	399
mml-miR-377-3p	60	262	180	38	121	58	395	60	276
mml-miR-379-5p	60	186	84	6	23	19	415	65	263
mml-miR-151-3p	57	1394	1757	72	380	164	958	240	910
mml-miR-134-5p	55	425	375	89	116	85	984	186	435
mml-miR-106a-5p	55	323	464	27	141	42	444	44	226
mml-miR-708-3p	55	287	304	13	120	70	294	46	232
mml-miR-497-5p	54	431	230	16	71	23	307	91	271
mml-miR-409-3p	53	636	735	162	798	307	1873	310	935
mml-miR-15b-5p	53	100	127	4	44	12	171	24	139
mml-miR-154-5p	51	2559	1786	255	994	562	4174	835	3361
mml-miR-20b-5p	49	416	377	30	88	35	575	68	257
mml-miR-340-5p	44	548	647	31	228	73	395	119	306
mml-miR-425	43	824	754	56	475	139	1239	113	827
mml-miR-92b-3p	43	50	52	12	79	19	109	16	52
mml-miR-339-3p	42	492	447	34	229	81	897	106	386
mml-miR-874-3p	42	88	88	9	54	17	239	30	179
mml-miR-181c-5p	41	733	473	51	176	51	1347	251	359
mml-miR-628-3p	37	378	198	33	69	59	388	62	330
mml-miR-423-3p	35	54	52	10	53	9	98	28	100
mml-miR-132-5p	34	456	256	21	101	66	569	61	258
mml-miR-378d	33	630	526	90	351	197	1015	126	1088
mml-miR-15a-5p	32	242	175	16	115	34	234	73	158
mml-miR-299-5p	31	93	28	3	12	18	114	14	137
mml-miR-145-3p	30	293	180	48	142	81	851	145	296
mml-miR-29b-2-5p	30	157	129	12	39	33	264	53	171
mml-miR-155	30	113	106	13	32	15	192	111	105
mml-miR-204-5p	28	145	128	28	72	9	273	180	69
mml-miR-409-5p	28	153	105	16	55	41	263	60	161
mml-miR-218-5p	28	122	94	2	52	40	280	12	164
mml-miR-18b	26	1182	1181	45	347	117	755	213	920
mml-miR-4446-3p	26	821	322	26	16	16	1297	147	200
mml-miR-18a-5p	25	1105	1104	41	337	109	665	201	850
mml-miR-136	25	459	287	36	183	90	599	153	295
mml-miR-505-5p	23	176	119	31	83	60	113	42	365
mml-miR-148b-3p	22	186	185	22	113	59	176	51	126
mml-miR-139-3p	22	223	114	19	87	71	246	24	190
mml-miR-142-3p	21	1582	1568	139	604	261	1744	545	806
mml-miR-652	21	181	142	41	102	39	235	64	502
mml-miR-30e-5p	21	173	270	30	132	72	450	61	266
mml-miR-495-3p	21	39	18	4	17	11	54	21	37
mml-miR-671-5p	21	154	160	25	30	9	251	26	47
mml-miR-34a-5p	18	71	51	16	71	55	119	86	199
mml-miR-154-3p	17	73	91	7	56	28	189	12	155
mml-miR-25	16	120	196	5	71	18	195	31	159
mml-miR-28-5p	15	656	981	96	417	149	1748	270	683
mml-miR-380-3p	15	258	312	17	77	46	892	45	334
mml-miR-299-3p	15	85	98	15	50	35	171	48	94
mml-miR-30b-3p	15	98	76	7	42	18	137	33	123
mml-miR-19b	15	37	46	1	18	5	60	7	55
mml-miR-365-3p	14	25	22	1	37	23	38	10	46
mml-miR-490-5p	14	410	214	44	73	43	616	301	233
mml-miR-92a-3p	14	30	85	4	37	6	47	11	34
mml-miR-3200-5p	14	52	39	6	18	13	46	2	77
mml-miR-93-5p	14	93	211	14	160	15	228	19	45
mml-miR-7203-5p	14	68	26	0	0	0	149	38	7
mml-miR-339-5p	13	102	83	2	38	19	124	35	90
mml-miR-497-3p	13	102	124	2	34	3	78	21	60
mml-miR-221-5p	12	155	70	8	46	27	236	21	142
mml-miR-499-5p	12	40	60	3	15	5	37	5	33
mml-miR-193b-5p	11	83	62	16	50	69	129	61	118
mml-miR-337-5p	11	167	96	65	106	71	331	109	262
mml-miR-149-3p	11	171	76	20	16	8	194	46	100
mml-miR-31-5p	11	117	83	8	12	5	373	35	36
mml-miR-770-5p	11	49	29	5	3	1	99	20	59
mml-miR-503-5p	11	44	29	7	9	4	97	2	24
mml-miR-491-5p	10	56	46	5	18	23	99	14	39
mml-miR-7205-5p	10	54	33	1	1	22	59	35	62
mml-miR-199a-5p	10	143	69	9	10	24	154	46	100
mml-miR-199a	10	143	69	9	10	24	154	46	100
mml-miR-150-5p	10	55	33	3	7	5	92	21	55
mml-miR-3200-3p	10	19	22	2	7	6	11	6	35
mml-miR-190a-5p	9	4171	3216	210	692	626	3641	919	1757
mml-miR-592-5p	9	105	57	11	40	13	213	6	113
mml-miR-433-5p	9	112	86	7	41	42	215	31	176
mml-miR-499-3p	9	113	122	8	71	12	31	15	31
mml-miR-105-5p	9	20	11	2	1	1	38	6	22
mml-miR-125a-3p	8	164	138	30	41	36	263	105	192
mml-miR-135a-5p	8	232	193	15	27	20	375	50	102
mml-miR-887	8	346	264	58	224	51	396	190	165
mml-miR-152-3p	8	107	123	8	53	27	74	49	59
mml-miR-330-5p	8	38	41	0	15	4	28	8	45
mml-miR-135a-2-3p	8	84	38	17	1	1	135	17	24
mml-miR-1224-5p	8	45	32	6	2	10	70	8	50
mml-miR-125b-2-3p	7	299	212	23	119	64	678	111	278
mml-miR-204-3p	7	348	242	100	45	17	377	544	132
mml-miR-369-3p	7	93	100	6	36	31	153	22	68
mml-miR-676-3p	7	199	114	28	23	17	196	71	132
mml-miR-383	7	36	24	15	18	10	42	12	46
mml-miR-1260b	7	20	28	53	21	27	48	35	24
mml-miR-539	6	640	260	65	168	118	949	199	734
mml-miR-130b-3p	6	501	288	61	92	49	569	155	328
mml-miR-193b-3p	6	39	30	6	87	75	64	25	90
mml-miR-376a-1-5p	6	126	113	9	107	56	271	25	163
mml-miR-296-3p	6	87	73	18	21	12	128	20	96
mml-miR-199a-3p	6	40	58	12	31	18	193	18	72
mml-miR-331-5p	6	82	29	5	16	7	101	13	61
mml-miR-485-5p	5	75	66	26	43	38	221	52	84
mml-miR-541-5p	5	158	123	19	151	58	303	94	155
mml-miR-92b-5p	5	42	55	21	27	17	62	30	26
mml-miR-1-3p	5	134	42	2	4	20	157	116	61
mml-miR-485-3p	5	1	4	2	4	2	13	2	7
mml-miR-329-3p	5	1	10	0	5	1	23	3	2
mml-miR-6134	5	84	71	9	13	10	86	25	45
mml-miR-502-3p	5	17	32	3	10	5	36	7	24
mml-miR-203	5	42	49	3	23	0	60	10	30
mml-miR-323b-5p	5	4	4	0	0	1	15	3	6
mml-miR-191-3p	5	2	6	0	0	2	10	4	13
mml-miR-638	5	4	1	1	1	0	2	0	1
mml-miR-211	4	34	44	2	28	6	28	22	29
mml-miR-877-5p	4	217	130	26	35	30	199	56	176
mml-miR-323a-5p	4	53	39	12	13	10	116	34	42
mml-miR-486-5p	4	41	26	18	22	19	102	32	33
mml-miR-219-5p	4	69	103	4	35	10	19	30	27
mml-miR-219	4	69	103	4	35	10	19	30	27
mml-miR-410-3p	4	33	19	3	13	8	52	4	32
mml-miR-137-5p	4	61	29	3	1	10	147	4	51
mml-miR-93-3p	4	11	25	0	21	0	28	4	26
mml-miR-584-5p	4	5	9	0	11	1	2	6	5
mml-miR-34c-3p	4	0	1	11	0	0	2	0	0
mml-miR-500a-5p	4	9	15	2	5	1	19	0	11
mml-miR-500b-5p	4	9	15	2	5	1	19	0	11
mml-miR-192-5p	4	1	3	1	2	0	2	0	2
mml-miR-125b-1-3p	3	273	193	56	143	81	366	189	213
mml-miR-769-5p	3	60	45	5	29	13	91	12	61
mml-miR-375	3	8	19	37	9	8	35	6	12
mml-miR-424-5p	3	90	83	6	34	14	104	22	46
mml-miR-532-5p	3	46	26	5	9	5	46	32	40
mml-miR-758-5p	3	67	51	9	10	5	99	24	23
mml-miR-320c	3	11	14	1	3	3	20	5	9
mml-miR-127-5p	3	46	26	11	27	27	86	15	56
mml-miR-513b	3	10	3	49	2	0	12	2	31
mml-miR-598-5p	3	38	7	5	3	5	62	11	28
mml-miR-656-5p	3	5	11	5	6	3	60	5	16
mml-miR-188-5p	3	50	28	9	15	15	73	21	43
mml-miR-184	3	21	19	6	3	0	106	5	28
mml-miR-381-5p	3	10	10	0	10	3	21	0	8
mml-miR-452-5p	3	6	16	1	21	1	6	0	6
mml-miR-504-3p	3	27	18	0	1	2	61	2	58
mml-miR-7181-3p	3	2	1	0	5	2	8	1	5
mml-miR-665	3	20	23	4	8	4	30	5	26
mml-miR-135b-5p	3	15	8	0	11	2	10	22	5
mml-miR-505-3p	3	1	2	0	6	6	0	2	6
mml-miR-1255a-5p	3	6	7	2	2	1	7	2	20
mml-miR-362-3p	3	5	2	0	3	3	7	2	4
mml-miR-4766-3p	3	9	8	0	3	1	10	1	6
mml-miR-187-3p	2	40	49	8	50	40	92	5	69
mml-miR-301a-3p	2	93	75	5	27	13	124	17	65
mml-miR-495-5p	2	53	30	1	23	9	83	16	65
mml-miR-577-5p	2	44	47	2	19	5	14	8	22
mml-miR-940	2	31	24	12	34	20	66	31	38
mml-miR-362-5p	2	47	48	4	23	6	61	16	28
mml-miR-1271-5p	2	28	37	3	29	3	23	3	20
mml-miR-101-1-5p	2	83	68	6	30	4	91	24	64
mml-miR-24-5p	2	57	49	1	27	11	42	20	45
mml-miR-17-3p	2	37	32	1	25	9	49	9	37
mml-miR-627-5p	2	17	28	1	0	1	14	9	15
mml-miR-20a-3p	2	26	21	0	7	3	22	2	12
mml-miR-543-5p	2	3	3	0	0	1	2	0	5
mml-miR-212-3p	2	9	27	4	3	5	16	5	12
mml-miR-3173	2	7	49	0	26	5	23	10	9
mml-miR-760	2	26	27	2	4	3	50	6	21
mml-miR-142-5p	2	27	23	5	3	3	7	5	6
mml-miR-374a-3p	2	28	13	1	2	1	9	3	5
mml-miR-504-5p	2	3	5	0	11	2	21	0	6
mml-miR-654-5p	2	6	1	0	1	0	4	0	3
mml-miR-194-5p	2	6	1	2	4	1	24	5	10
mml-miR-455-5p	2	6	10	0	4	0	32	0	11
mml-miR-410-5p	2	10	5	3	1	2	8	2	5
mml-miR-1226	2	2	2	0	1	5	4	2	3
mml-miR-195-3p	2	13	2	1	0	2	10	2	4
mml-miR-412-5p	2	2	2	0	0	0	9	0	4
mml-miR-7201-5p	2	1	4	0	0	0	1	0	0
mml-miR-129-2-3p	1	26	17	9	31	8	34	9	31
mml-miR-451	1	27	28	57	52	28	156	133	100
mml-miR-543-3p	1	11	18	2	10	2	26	6	23
mml-miR-340-3p	1	48	28	2	9	10	49	10	24
mml-miR-130a-3p	1	113	45	28	9	5	146	19	73
mml-miR-378a	1	73	57	6	59	22	104	7	97
mml-miR-377-5p	1	11	13	2	13	5	37	9	29
mml-miR-1185-5p	1	73	54	11	28	14	142	37	56
mml-miR-7180-3p	1	26	15	0	20	7	78	18	44
mml-miR-541-3p	1	13	6	3	11	6	48	14	29
mml-miR-513a	1	6	12	51	2	1	14	0	23
mml-miR-153-3p	1	26	16	3	1	6	24	2	34
mml-miR-193a-5p	1	17	14	6	5	1	73	3	5
mml-miR-500a-3p	1	9	18	2	6	2	18	1	10
mml-miR-148a-3p	1	13	7	1	12	6	10	1	27
mml-miR-128a-5p	1	19	7	0	2	3	45	1	12
mml-miR-32-5p	1	28	26	8	9	8	13	17	6
mml-miR-206	1	11	8	3	0	2	24	46	27
mml-miR-363-3p	1	15	19	1	3	4	22	4	11
mml-miR-545	1	42	32	5	7	3	20	7	17
mml-miR-30b-5p	1	16	22	0	6	5	24	8	13
mml-miR-181c-3p	1	37	21	1	9	5	72	7	19
mml-miR-487a	1	8	12	0	6	6	26	2	20
mml-miR-486-3p	1	12	6	8	4	9	22	12	9
mml-miR-490-3p	1	19	15	5	2	1	34	19	10
mml-miR-370-5p	1	18	12	3	3	2	35	3	21
mml-miR-656-3p	1	6	7	0	2	0	6	1	4
mml-miR-208b-3p	1	8	6	1	3	1	9	0	17
mml-miR-7174-5p	1	20	14	2	18	8	8	3	21
mml-miR-30c-1-3p	1	17	16	0	2	2	19	11	6
mml-miR-532-3p	1	2	6	3	0	0	7	3	8
mml-miR-34b	1	25	11	1	5	0	12	1	6
mml-miR-1298-5p	1	7	5	0	0	0	7	1	3
mml-miR-411-3p	1	4	2	0	0	2	5	1	3
mml-miR-1262-3p	1	9	6	0	0	3	11	3	4
mml-miR-1243-3p	1	12	14	0	6	0	3	2	6
mml-miR-4766-5p	1	9	6	3	1	1	9	5	4
mml-miR-1225-5p	1	7	4	4	4	2	24	6	13
mml-miR-663	1	0	0	3	2	0	2	0	0
mml-miR-431	1	1	1	0	1	0	6	0	0
mml-miR-758-3p	1	1	1	0	0	0	2	0	2
mml-miR-6505-5p	1	5	2	0	2	0	4	0	7
mml-let-7e-3p	1	2	0	0	0	0	1	0	0
mml-miR-365-1-5p	1	1	1	0	0	0	0	0	3
mml-miR-1306-5p	1	0	3	0	0	0	0	1	3
mml-miR-214-5p	1	3	4	1	2	2	4	2	1
mml-miR-1251-5p	1	1	0	0	0	0	7	1	1
mml-miR-7198-3p	1	1	0	0	0	1	2	0	1
mml-miR-668	1	3	0	0	2	0	0	0	1
mml-miR-1240	1	0	0	0	1	1	2	0	2
mml-miR-548j-3p	1	0	2	0	1	0	0	0	0
mml-miR-18a-3p	1	0	0	0	0	0	3	0	0
mml-miR-182	1	0	0	0	2	0	0	1	1
mml-miR-186-3p	1	0	2	0	0	0	1	0	0
mml-miR-7174-3p	1	0	0	0	0	0	0	0	0
mml-miR-498	1	0	0	0	0	0	0	0	0
mml-miR-7188-3p	0	0	0	0	0	0	0	0	0
mml-miR-7164-3p	0	0	0	0	0	0	0	0	0
mml-miR-7175-3p	0	0	0	0	0	0	0	0	0
mml-miR-607	0	0	0	0	0	0	0	0	0
mml-miR-1306-3p	0	0	0	0	0	0	0	0	0
mml-miR-920	0	0	0	0	0	0	0	0	0
mml-miR-569	0	0	0	0	0	0	0	0	0
mml-miR-7168-5p	0	0	0	0	0	0	0	0	0
mml-miR-1250	0	0	0	0	0	0	0	0	0
mml-miR-520a-5p	0	0	0	0	0	0	0	0	0
mml-miR-1-2-5p	0	0	0	0	0	0	0	0	0
mml-miR-449a-3p	0	0	0	0	0	0	0	0	0
mml-miR-516b	0	0	0	0	0	0	0	0	0
mml-miR-579	0	0	0	0	0	0	0	0	0
mml-miR-372-5p	0	0	0	0	0	0	0	0	0
mml-miR-762	0	0	0	0	0	0	0	0	0
mml-miR-644	0	0	0	0	0	0	0	0	0
mml-miR-367	0	0	0	0	0	0	0	0	0
mml-miR-7192-5p	0	0	0	0	0	0	0	0	0
mml-miR-7164-5p	0	0	0	0	0	0	0	0	0
mml-miR-133c-5p	0	0	0	0	0	0	0	0	0
mml-miR-759	0	0	0	0	0	0	0	0	0
mml-miR-7171-3p	0	0	0	0	0	0	0	0	0
mml-miR-558	0	0	0	0	0	0	0	0	0
mml-miR-7176-5p	0	0	0	0	0	0	0	0	0
mml-miR-7170-3p	0	0	0	0	0	0	0	0	0
mml-miR-192-3p	0	0	0	0	0	0	0	0	0
mml-miR-626	0	0	0	0	0	0	0	0	0
mml-miR-3577-3p	0	0	0	0	0	0	0	0	0
mml-miR-650c	0	0	0	0	0	0	0	0	0
mml-miR-556-3p	0	0	0	0	0	0	0	0	0
mml-miR-506-5p	0	0	0	0	0	0	0	0	0
mml-miR-33b-3p	0	0	0	0	0	0	0	0	0
mml-miR-181b-2-3p	0	0	0	0	0	0	0	0	0
mml-miR-3927	0	0	0	0	0	0	0	0	0
mml-miR-7169-5p	0	0	0	0	0	0	0	0	0
mml-miR-297	0	0	0	0	0	0	0	0	0
mml-miR-524-5p	0	0	0	0	0	0	0	0	0
mml-miR-216a-3p	0	0	0	0	0	0	0	0	0
mml-miR-6131	0	0	0	0	0	0	0	0	0
mml-miR-518b	0	0	0	0	0	0	0	0	0
mml-miR-143-5p	0	0	0	0	0	0	0	0	0
mml-miR-570	0	0	0	0	0	0	0	0	0
mml-miR-10a-3p	0	0	0	0	0	0	0	0	0
mml-miR-7202-3p	0	0	0	0	0	0	0	0	0
mml-miR-1323-3p	0	0	0	0	0	0	0	0	0
mml-miR-7182-5p	0	0	0	0	0	0	0	0	0
mml-miR-7197-3p	0	0	0	0	0	0	0	0	0
mml-miR-578	0	0	0	0	0	0	0	0	0
mml-miR-1239	0	0	0	0	0	0	0	0	0
mml-miR-7199-5p	0	0	0	0	0	0	0	0	0
mml-miR-7200-3p	0	0	0	0	0	0	0	0	0
mml-miR-938	0	0	0	0	0	0	0	0	0
mml-miR-7169-3p	0	0	0	0	0	0	0	0	0
mml-miR-7165-3p	0	0	0	0	0	0	0	0	0
mml-miR-215-3p	0	0	0	0	0	0	0	0	0
mml-miR-7173-3p	0	0	0	0	0	0	0	0	0
mml-miR-525	0	0	0	0	0	0	0	0	0
mml-miR-7173-5p	0	0	0	0	0	0	0	0	0
mml-miR-7172-3p	0	0	0	0	0	0	0	0	0
mml-miR-374b-5p	0	49	63	6	28	9	117	16	74
mml-miR-657	0	0	0	0	0	0	0	0	0
mml-miR-640	0	0	0	0	0	0	0	0	0
mml-miR-6794-3p	0	0	0	0	0	0	0	0	0
mml-miR-23a-5p	0	0	0	0	0	0	0	0	0
mml-miR-891b-3p	0	0	0	0	0	0	0	0	0
mml-miR-7191-3p	0	0	0	0	0	0	0	0	0
mml-miR-7190-3p	0	0	0	0	0	0	0	0	0
mml-miR-609	0	0	0	0	0	0	0	0	0
mml-miR-650a	0	0	0	0	0	0	0	0	0
mml-miR-342-5p	0	115	64	15	35	36	193	31	140
mml-miR-764	0	0	0	0	0	0	0	0	0
mml-miR-222-5p	0	0	0	0	0	0	0	0	0
mml-miR-875-3p	0	0	0	0	0	0	0	0	0
mml-miR-512-3p	0	0	0	0	0	0	0	0	0
mml-miR-650d	0	0	0	0	0	0	0	0	0
mml-miR-384	0	0	0	0	0	0	0	0	0
mml-miR-599-3p	0	0	0	0	0	0	0	0	0
mml-miR-7181-5p	0	0	0	0	0	0	0	0	0
mml-miR-3154	0	0	0	0	0	0	0	0	0
mml-miR-193a-3p	0	112	99	19	42	10	106	28	24
mml-miR-27b-5p	0	77	56	5	23	9	69	12	64
mml-miR-422a	0	0	0	0	0	0	0	0	0
mml-miR-3938-3p	0	38	46	2	14	9	40	10	12
mml-miR-599-5p	0	0	0	0	0	0	0	0	0
mml-miR-1227	0	0	0	0	0	0	0	0	0
mml-miR-144	0	66	34	49	38	23	45	110	24
mml-miR-601	0	0	0	0	0	0	0	0	0
mml-miR-3151	0	49	47	9	16	5	124	34	31
mml-miR-574	0	10	33	3	6	8	8	12	1
mml-miR-670-3p	0	0	0	0	0	0	0	0	0
mml-miR-631	0	0	0	0	0	0	0	0	0
mml-miR-185-3p	0	19	32	3	14	5	42	24	9
mml-miR-128b-5p	0	32	32	4	14	13	101	14	45
mml-miR-148b-5p	0	41	24	2	33	3	31	1	31
mml-miR-567	0	0	0	0	0	0	0	0	0
mml-miR-873-5p	0	62	40	6	11	2	129	12	38
mml-miR-557	0	0	0	0	0	0	0	0	0
mml-miR-210-3p	0	7	5	1	3	0	4	10	3
mml-miR-100-3p	0	0	0	0	0	0	0	0	0
mml-miR-516a-5p	0	0	0	0	0	0	0	0	0
mml-miR-619	0	0	0	0	0	0	0	0	0
mml-miR-7207-3p	0	0	0	0	0	0	0	0	0
mml-miR-654-3p	0	11	18	3	18	3	40	2	22
mml-miR-194-3p	0	0	0	0	0	0	0	0	0
mml-miR-622	0	0	0	0	0	0	0	0	0
mml-miR-376b-5p	0	21	26	3	25	13	39	5	24
mml-miR-29b-1-5p	0	23	28	3	10	1	51	5	28
mml-miR-376c-5p	0	21	26	2	20	11	32	3	17
mml-miR-933	0	0	0	0	0	0	0	0	0
mml-miR-511-3p	0	2	1	0	7	0	6	4	0
mml-miR-1249	0	5	9	3	8	0	6	6	0
mml-miR-346	0	3	4	0	3	2	4	3	0
mml-miR-374a-5p	0	7	9	0	2	1	13	2	6
mml-miR-524-3p	0	0	0	0	0	0	0	0	0
mml-miR-200c-5p	0	0	0	0	0	0	0	0	0
mml-let-7b-3p	0	18	23	1	7	4	19	2	11
mml-miR-582-5p	0	13	13	0	1	1	15	1	2
mml-miR-376a-2-5p	0	18	15	2	16	16	22	2	16
mml-miR-548j-5p	0	0	0	0	0	0	0	0	0
mml-miR-556-5p	0	0	0	0	0	0	0	0	0
mml-miR-548h-5p	0	10	28	1	10	1	9	5	6
mml-miR-518d-3p	0	0	0	0	0	0	0	0	0
mml-miR-548a	0	0	0	0	0	0	0	0	0
mml-miR-33b-5p	0	17	15	8	39	8	8	12	2
mml-miR-296-5p	0	1	1	0	1	3	6	1	4
mml-miR-7163-5p	0	0	0	0	0	0	0	0	0
mml-miR-653-3p	0	0	8	4	3	0	1	0	5
mml-miR-922	0	0	0	0	0	0	0	0	0
mml-miR-593	0	0	0	0	0	0	0	0	0
mml-miR-590-5p	0	15	9	1	9	1	10	0	4
mml-miR-224-5p	0	13	9	2	8	1	4	2	11
mml-miR-7184-3p	0	6	7	0	4	0	17	2	14
mml-miR-183-5p	0	2	10	1	4	3	7	5	10
mml-miR-518f	0	0	0	0	0	0	0	0	0
mml-miR-19a-3p	0	13	14	0	7	0	15	1	15
mml-miR-7190-5p	0	0	0	0	0	0	0	0	0
mml-miR-7184-5p	0	0	2	0	3	0	5	3	5
mml-miR-6827-5p	0	22	21	1	0	0	18	5	14
mml-miR-6505-3p	0	0	0	0	0	0	0	0	0
mml-miR-671-3p	0	9	5	1	9	0	18	2	9
mml-miR-874-5p	0	3	11	1	2	4	14	9	8
mml-miR-493-3p	0	10	7	3	9	0	31	4	17
mml-miR-944	0	0	0	0	0	0	0	0	0
mml-miR-1298-3p	0	18	10	0	0	0	8	0	4
mml-miR-7197-5p	0	0	0	0	0	0	0	0	0
mml-miR-487b-5p	0	3	6	0	0	0	11	2	3
mml-miR-448	0	4	6	1	1	0	6	0	12
mml-miR-1296-5p	0	17	8	1	4	0	34	3	10
mml-miR-7206-5p	0	0	0	0	0	0	0	0	0
mml-miR-382-3p	0	3	5	0	1	0	4	0	2
mml-miR-107-5p	0	12	2	0	2	0	5	10	6
mml-let-7a-3p	0	6	4	0	2	0	1	2	6
mml-miR-7206-3p	0	17	7	1	7	6	4	2	5
mml-miR-7186-5p	0	3	5	0	0	0	9	5	1
mml-miR-10a-5p	0	1	5	1	5	0	0	6	8
mml-miR-92a-5p	0	0	0	0	0	0	0	0	0
mml-miR-604	0	0	0	0	0	0	0	0	0
mml-miR-4536	0	0	0	0	0	0	0	0	0
mml-miR-592-3p	0	0	0	0	0	0	0	0	0
mml-miR-6128	0	0	0	0	0	0	0	0	0
mml-miR-7180-5p	0	1	7	0	0	4	8	0	12
mml-miR-544	0	2	1	0	2	1	0	1	1
mml-miR-571	0	0	0	0	0	0	0	0	0
mml-miR-3938-5p	0	2	1	0	0	0	2	0	0
mml-miR-583	0	0	0	0	0	0	0	0	0
mml-miR-518a-3p	0	0	0	0	0	0	0	0	0
mml-miR-21-3p	0	2	8	1	11	0	14	17	15
mml-miR-542-5p	0	10	13	1	1	1	21	0	4
mml-miR-769-3p	0	8	2	1	3	1	13	1	8
mml-miR-627-3p	0	1	2	0	0	0	3	2	2
mml-miR-7203-3p	0	0	0	0	0	0	0	0	0
mml-miR-450a-5p	0	2	0	0	0	0	4	0	4
mml-miR-328	0	0	0	2	1	1	2	1	1
mml-miR-217	0	8	4	7	7	0	14	0	8
mml-miR-892c-5p	0	2	2	0	1	0	12	0	7
mml-miR-7202-5p	0	7	1	1	5	0	3	0	3
mml-miR-1235	0	0	0	0	0	0	0	0	0
mml-miR-30c-2-3p	0	6	12	3	1	1	13	2	4
mml-miR-889-5p	0	5	4	2	0	2	11	2	6
mml-miR-3059-5p	0	2	3	1	0	0	11	1	1
mml-miR-190b	0	12	2	2	1	0	10	4	5
mml-miR-214-3p	0	1	0	1	1	0	3	0	0
mml-miR-488-5p	0	1	2	2	0	1	3	1	1
mml-miR-7194-3p	0	0	0	0	0	0	0	0	0
mml-miR-33a	0	5	15	1	11	2	6	6	5
mml-miR-324-3p	0	1	0	1	1	2	7	0	3
mml-miR-329-1-5p	0	3	1	1	2	0	6	0	2
mml-miR-590-3p	0	6	5	1	2	1	3	2	5
mml-miR-1247-5p	0	0	3	2	1	0	3	0	0
mml-miR-1296-3p	0	5	3	0	2	4	3	10	2
mml-miR-30e-3p	0	8	6	0	4	0	8	4	0
mml-miR-554	0	0	0	0	0	0	0	0	0
mml-let-7g-3p	0	10	7	0	0	0	11	2	3
mml-miR-105-3p	0	5	3	2	0	3	11	6	1
mml-miR-379-3p	0	3	0	1	1	1	8	2	4
mml-miR-7189-5p	0	0	0	0	0	0	0	0	0
mml-miR-198	0	0	0	0	0	0	0	0	0
mml-miR-3145-5p	0	0	0	0	0	0	0	0	0
mml-miR-183-3p	0	0	0	0	0	0	0	0	0
mml-miR-493-5p	0	5	1	0	0	2	4	0	1
mml-miR-196b-5p	0	7	0	4	0	0	8	2	3
mml-miR-648	0	0	0	0	0	0	0	0	0
mml-miR-380-5p	0	4	3	2	4	0	9	2	0
mml-miR-7183-5p	0	6	6	0	0	0	8	2	2
mml-miR-212-5p	0	1	2	0	0	0	3	0	1
mml-miR-103-5p	0	4	0	0	2	0	2	2	3
mml-miR-6790-3p	0	1	2	0	0	0	6	1	4
mml-miR-7187-5p	0	0	0	0	0	0	0	0	0
mml-miR-550-5p	0	0	4	0	0	0	4	1	2
mml-miR-106b-3p	0	0	1	0	0	0	1	2	0
mml-miR-639	0	0	0	0	0	0	0	0	0
mml-miR-4703-5p	0	0	0	0	0	0	0	0	0
mml-miR-429-3p	0	3	0	1	2	2	4	1	1
mml-miR-181b-1-3p	0	0	0	0	0	0	0	0	0
mml-miR-1304	0	2	0	1	0	0	6	2	1
mml-miR-519b	0	0	0	0	0	0	0	0	0
mml-miR-200a-3p	0	5	0	1	2	2	4	1	1
mml-miR-372-3p	0	0	0	2	2	0	2	0	0
mml-miR-335-3p	0	1	0	0	0	1	3	0	2
mml-miR-4446-5p	0	4	1	0	0	0	2	0	4
mml-miR-891b-5p	0	2	0	0	2	0	5	0	3
mml-miR-216b	0	0	0	0	0	0	3	0	2
mml-miR-939	0	2	1	0	5	6	8	5	0
mml-miR-329-2-5p	0	1	2	0	0	2	4	0	3
mml-miR-1277	0	0	0	0	0	0	0	0	1
mml-miR-223	0	1	2	0	0	1	3	0	2
mml-miR-134-3p	0	1	0	0	0	0	2	0	1
mml-miR-597	0	0	0	0	0	0	0	0	0
mml-miR-301b	0	7	3	0	0	1	4	2	2
mml-miR-7166-5p	0	4	0	0	1	0	2	0	1
mml-miR-502-5p	0	0	0	0	0	0	0	0	0
mml-miR-6127	0	0	0	0	0	0	0	0	0
mml-let-7f-3p	0	2	5	1	0	0	4	0	2
mml-miR-432-3p	0	0	0	0	0	0	0	0	0
mml-miR-572	0	0	0	0	0	0	0	0	0
mml-miR-562	0	0	0	0	0	0	0	0	0
mml-miR-661	0	0	0	0	0	0	0	0	0
mml-miR-503-3p	0	6	0	0	5	0	0	0	0
mml-miR-122a-3p	0	0	0	0	0	0	0	0	0
mml-miR-130b-5p	0	1	2	0	0	0	1	1	0
mml-miR-26b-3p	0	0	2	0	2	0	4	0	1
mml-miR-16-1-3p	0	9	6	1	1	1	7	3	6
mml-miR-455-3p	0	3	3	0	1	2	0	2	0
mml-miR-337-3p	0	0	0	0	0	0	2	0	1
mml-miR-298	0	0	0	0	0	0	0	0	0
mml-miR-761	0	0	0	0	0	0	0	0	0
mml-miR-301a-5p	0	0	0	0	0	0	0	0	0
mml-miR-7196-3p	0	0	0	0	0	0	0	0	0
mml-miR-548i-5p	0	0	6	0	3	0	1	0	1
mml-miR-23b-5p	0	0	0	0	0	0	0	0	0
mml-miR-611	0	0	0	0	0	0	0	0	0
mml-miR-32-3p	0	0	0	0	0	0	0	0	0
mml-miR-1179	0	2	4	0	0	0	4	0	0
mml-miR-187-5p	0	0	0	1	3	2	0	0	0
mml-miR-122a-5p	0	4	2	0	1	0	5	1	9
mml-miR-582-3p	0	5	0	0	3	0	2	0	1
mml-miR-147b	0	5	3	0	2	4	3	4	2
mml-miR-7186-3p	0	1	0	0	0	0	1	1	0
mml-miR-133c-3p	0	0	0	0	0	0	3	6	0
mml-miR-133b-3p	0	0	0	0	0	0	3	6	0
mml-miR-148a-5p	0	1	1	0	1	0	1	0	2
mml-miR-510-5p	0	2	1	0	0	0	2	1	2
mml-miR-373	0	0	0	1	0	0	2	0	0
mml-miR-7200-5p	0	0	0	0	0	0	2	0	3
mml-miR-454-5p	0	0	0	0	0	0	0	0	0
mml-miR-133b-5p	0	0	0	0	0	0	0	0	0
mml-miR-1245-3p	0	0	0	0	0	0	0	0	0
mml-let-7i-3p	0	0	0	0	0	0	0	0	0
mml-miR-1258	0	3	4	0	1	0	3	1	1
mml-miR-197-5p	0	6	2	0	1	0	6	1	2
mml-miR-1224-3p	0	0	0	1	0	2	0	0	1
mml-miR-6529-3p	0	0	2	0	0	0	0	0	0
mml-miR-196a-5p	0	1	0	1	0	4	5	2	0
mml-miR-4667	0	0	4	0	0	0	2	0	0
mml-miR-876-5p	0	6	3	0	1	0	3	2	1
mml-miR-424-3p	0	1	3	0	1	0	6	0	1
mml-miR-26a-1-3p	0	1	1	0	1	0	0	0	0
mml-miR-1230	0	0	0	0	1	0	0	1	2
mml-miR-551a	0	5	0	0	0	0	0	2	3
mml-miR-548c	0	0	0	0	0	0	0	0	0
mml-miR-508-3p	0	0	1	1	0	0	1	0	1
mml-miR-10b-5p	0	0	0	0	1	0	1	0	0
mml-miR-664	0	0	0	0	0	0	0	0	0
mml-miR-675-3p	0	0	0	0	0	0	0	0	0
mml-miR-135a-1-3p	0	4	0	1	0	0	1	0	0
mml-miR-521	0	0	0	0	0	0	0	0	0
mml-miR-4743	0	0	1	0	0	1	3	3	3
mml-miR-501-5p	0	1	2	0	0	0	0	0	2
mml-miR-15a-3p	0	2	2	0	2	0	2	3	1
mml-miR-99b-3p	0	0	0	0	1	0	2	0	0
mml-miR-660-3p	0	0	1	0	0	0	1	5	1
mml-miR-449a-5p	0	1	0	0	1	0	2	2	1
mml-miR-27a-5p	0	0	0	0	0	0	0	0	0
mml-miR-934-3p	0	1	4	0	0	0	4	0	1
mml-miR-5697-3p	0	0	0	0	0	0	0	0	0
mml-miR-584-3p	0	2	2	1	0	1	0	0	1
mml-miR-3577-5p	0	3	3	0	0	0	1	0	4
mml-miR-4716	0	4	0	0	1	0	3	2	1
mml-miR-7195-5p	0	0	0	0	0	0	4	2	5
mml-miR-7166-3p	0	0	2	0	0	0	3	0	2
mml-miR-518g-5p	0	0	0	0	0	2	1	0	1
mml-miR-1284	0	0	0	0	0	0	0	0	0
mml-miR-1911-5p	0	1	3	0	0	0	2	0	0
mml-miR-892b	0	0	0	0	0	0	5	0	5
mml-miR-365-2-5p	0	1	0	0	0	0	0	0	1
mml-miR-514b-5p	0	0	0	1	0	0	0	0	2
mml-miR-924	0	0	0	0	0	0	0	0	0
mml-miR-29a-5p	0	0	2	0	0	2	5	0	0
mml-miR-147a	0	0	0	0	0	0	0	0	0
mml-miR-518d-5p	0	0	0	0	0	2	1	0	1
mml-miR-15b-3p	0	0	0	0	1	0	0	0	0
mml-miR-496	0	0	0	1	0	0	1	1	1
mml-miR-563	0	0	0	0	0	0	0	0	0
mml-miR-507	0	0	0	0	0	0	0	0	0
mml-miR-892c-3p	0	0	3	0	0	0	5	1	0
mml-miR-26a-2-3p	0	1	0	0	2	1	1	0	0
mml-miR-450a-1-3p	0	1	0	1	0	0	2	0	1
mml-miR-6794-5p	0	1	2	0	0	0	8	0	0
mml-miR-618	0	0	0	0	0	0	0	0	0
mml-miR-633	0	0	0	0	0	0	0	0	0
mml-miR-551b-3p	0	1	0	0	1	0	0	1	0
mml-miR-662	0	0	0	0	0	0	0	0	0
mml-miR-489-5p	0	0	1	0	1	0	1	0	0
mml-miR-5697-5p	0	0	0	0	0	0	2	0	1
mml-let-7c-3p	0	1	2	1	0	0	0	1	1
mml-miR-30d-3p	0	0	0	0	0	0	1	0	1
mml-miR-1255b	0	1	1	0	0	0	1	1	0
mml-miR-34a-3p	0	0	0	0	0	0	0	0	0
mml-miR-7193-5p	0	0	0	0	0	0	0	0	2
mml-miR-1180-5p	0	0	0	0	0	0	0	0	1
mml-miR-7207-5p	0	0	0	0	0	0	0	0	0
mml-miR-302a-3p	0	1	1	0	0	0	0	0	1
mml-miR-3146	0	2	1	0	0	0	1	2	0
mml-miR-29c-5p	0	2	0	0	0	0	4	0	0
mml-miR-16-2-3p	0	0	1	0	0	0	1	0	1
mml-miR-205	0	0	0	0	0	0	0	0	0
mml-miR-153-2-5p	0	1	6	0	1	0	3	0	0
mml-miR-876-3p	0	0	1	0	0	0	2	0	1
mml-miR-589	0	0	0	0	0	2	2	0	0
mml-miR-573	0	0	0	0	0	0	0	0	0
mml-miR-892a	0	1	0	0	0	0	5	0	0
mml-miR-302b	0	1	1	0	0	0	0	0	1
mml-miR-130a-5p	0	0	0	0	2	1	1	0	1
mml-miR-302d	0	1	1	0	0	0	0	0	1
mml-miR-302c	0	1	1	0	0	0	0	0	1
mml-miR-1232	0	1	0	2	0	0	0	0	0
mml-miR-491-3p	0	1	0	0	0	0	0	0	1
mml-miR-138-3p	0	0	1	0	3	0	1	2	0
mml-miR-586	0	1	3	0	1	0	0	0	0
mml-miR-218-2-3p	0	0	0	0	0	0	0	0	0
mml-miR-605	0	0	2	0	0	1	0	0	0
mml-miR-934-5p	0	0	0	0	0	0	0	0	0
mml-miR-548h-3p	0	2	0	0	0	0	1	1	0
mml-miR-216a-5p	0	1	1	0	0	0	2	0	0
mml-miR-548b	0	0	0	0	0	0	0	0	0
mml-miR-576-3p	0	1	0	0	0	0	0	0	0
mml-miR-7205-3p	0	0	0	0	0	1	0	0	1
mml-miR-494-3p	0	0	0	0	0	0	0	0	1
mml-miR-942-3p	0	1	0	0	0	0	0	0	0
mml-miR-224-3p	0	0	0	0	0	0	0	0	0
mml-miR-7208-3p	0	0	5	0	0	0	0	0	0
mml-miR-509	0	2	0	1	0	0	1	0	2
mml-miR-7188-5p	0	0	2	0	0	0	1	2	0
mml-miR-6827-3p	0	0	0	0	0	0	0	0	0
mml-miR-150-3p	0	2	1	0	0	0	0	0	1
mml-miR-146a-3p	0	0	0	0	0	0	0	0	0
mml-let-7a-2-3p	0	0	0	0	0	0	0	0	0
mml-miR-523b	0	0	0	0	0	0	0	0	0
mml-miR-196a-3p	0	0	0	0	0	0	0	0	0
mml-miR-3145-3p	0	0	3	0	0	0	1	0	0
mml-miR-4650	0	0	0	0	3	0	1	0	2
mml-miR-452-3p	0	0	0	0	0	0	0	0	0
mml-miR-1251-3p	0	0	0	0	0	0	0	1	0
mml-miR-4803	0	0	0	0	0	0	0	0	0
mml-miR-632	0	0	0	0	0	0	0	0	0
mml-miR-1233	0	0	0	0	0	0	0	0	0
mml-miR-510-3p	0	0	2	0	0	0	3	0	1
mml-miR-651	0	0	0	0	0	0	0	0	0
mml-miR-514a-5p	0	0	3	0	0	0	1	0	1
mml-miR-7179-5p	0	0	0	0	0	0	0	0	0
mml-miR-133a	0	0	0	0	0	0	0	1	0
mml-miR-7192-3p	0	0	0	0	0	0	0	0	0
mml-miR-890-5p	0	0	1	0	0	0	0	0	1
mml-miR-517a	0	1	0	0	0	0	2	0	0
mml-miR-506-3p	0	0	0	0	0	0	0	0	0
mml-miR-890-3p	0	1	1	0	0	0	0	0	0
mml-miR-6130	0	1	0	1	0	0	0	0	0
mml-miR-7170-5p	0	0	1	0	0	0	0	0	0
mml-miR-624	0	1	0	0	0	0	0	0	1
mml-miR-135b-3p	0	0	0	0	0	0	0	0	1
mml-miR-548d-5p	0	1	0	0	0	0	0	0	0
mml-miR-517c	0	0	0	0	0	0	0	0	0
mml-miR-1283	0	0	0	0	0	0	0	0	0
mml-miR-7199-3p	0	2	0	0	0	0	0	0	0
mml-miR-494-5p	0	0	0	0	1	0	0	0	0
mml-miR-101-2-5p	0	0	0	0	0	0	0	0	0
mml-miR-873-3p	0	1	0	1	2	0	0	0	1
mml-miR-450b-3p	0	0	0	0	0	0	0	0	0
mml-miR-7193-3p	0	0	0	0	3	0	0	0	0
mml-miR-577-3p	0	2	0	0	0	0	0	0	0
mml-miR-520g	0	0	0	0	0	0	0	0	0
mml-miR-4796-3p	0	0	0	0	0	0	0	0	2
mml-miR-7178-5p	0	1	1	0	0	0	0	0	0
mml-miR-1-1-5p	0	0	0	0	0	0	0	0	0
mml-miR-450b-5p	0	0	0	0	0	0	1	0	0
mml-miR-141-3p	0	1	1	0	0	0	1	1	0
mml-miR-4677-5p	0	0	0	0	0	0	0	0	0
mml-miR-518e	0	0	0	0	0	0	0	0	1
mml-miR-96	0	0	0	0	1	0	0	0	0
mml-miR-603	0	0	0	0	0	0	0	0	0
mml-miR-549a	0	0	0	0	0	0	0	0	0
mml-miR-218-1-3p	0	0	0	0	0	0	0	0	0
mml-miR-6790-5p	0	0	0	0	0	0	2	0	0
mml-miR-549b-5p	0	0	0	0	0	0	1	0	0
mml-miR-891a	0	0	0	0	0	0	0	0	0
mml-miR-190a-3p	0	0	0	0	0	0	0	0	1
mml-miR-936	0	0	0	0	1	1	0	0	1
mml-miR-514b-3p	0	0	0	0	0	0	0	0	0
mml-miR-210-5p	0	0	0	0	0	0	0	0	0
mml-miR-636	0	0	0	0	0	0	0	0	0
mml-miR-1271-3p	0	1	0	0	0	1	0	0	1
mml-miR-517b	0	0	0	0	0	0	0	0	1
mml-miR-7185-3p	0	0	0	0	0	0	0	0	0
mml-miR-371-3p	0	0	0	0	0	0	0	0	0
mml-miR-1911-3p	0	0	0	0	0	0	0	0	0
mml-miR-1243-5p	0	0	0	0	0	0	0	0	0
mml-miR-7163-3p	0	0	0	0	0	0	0	0	0
mml-miR-519a-3p	0	0	0	0	0	0	0	0	0
mml-miR-581	0	0	0	0	0	0	0	0	0
mml-miR-568	0	0	0	0	0	0	0	0	0
mml-miR-1185-3p	0	0	0	0	0	0	0	0	1
mml-miR-1245-5p	0	0	0	0	0	0	0	0	0
mml-miR-767-3p	0	0	0	0	0	0	1	1	0
mml-miR-7201-3p	0	0	0	0	0	0	0	0	0
mml-miR-124a-5p	0	0	0	0	0	1	0	1	1
mml-miR-508-5p	0	0	0	1	0	0	0	0	0
mml-miR-1234	0	0	0	0	1	0	0	0	0
mml-miR-7198-5p	0	0	0	0	0	0	0	0	1
mml-miR-3167-3p	0	0	0	0	0	0	0	0	0
mml-miR-937	0	0	0	0	2	0	0	0	0
mml-miR-7175-5p	0	0	0	0	0	0	0	0	0
mml-miR-1262-5p	0	0	0	0	0	0	0	0	0
mml-miR-551b-5p	0	0	0	0	0	0	0	0	1
mml-miR-670-5p	0	0	0	0	0	0	1	0	1
mml-miR-2114	0	0	0	0	1	0	0	0	0
mml-miR-141-5p	0	0	0	0	0	0	2	0	0
mml-miR-7185-5p	0	2	0	0	0	0	0	0	0
mml-miR-548e	0	0	0	0	0	0	0	0	0
mml-miR-580	0	0	0	0	0	0	0	0	0
mml-miR-3059-3p	0	1	0	0	0	0	0	0	0
mml-miR-371-5p	0	0	0	0	0	0	0	0	0
mml-miR-99a-3p	0	0	0	0	0	0	1	0	1
mml-miR-526b	0	1	0	0	0	0	1	0	0
mml-miR-106a-3p	0	0	0	0	0	0	0	0	0
mml-miR-642	0	0	1	0	0	0	0	0	0
mml-miR-550-3p	0	0	0	0	0	0	0	0	0
mml-miR-518c-3p	0	0	0	0	0	0	0	0	0
mml-miR-7204-3p	0	0	0	0	0	0	0	0	0
mml-miR-519d	0	0	0	0	0	0	0	0	0
mml-miR-514a-3p	0	0	0	0	0	0	0	0	0
mml-miR-676-5p	0	0	0	0	0	0	0	0	0
mml-miR-519c	0	1	1	0	0	0	0	0	0
mml-miR-325	0	0	0	0	0	0	0	0	0
mml-miR-615-3p	0	0	0	0	0	0	0	0	0
mml-miR-7172-5p	0	1	0	0	0	1	0	0	0
mml-miR-711	0	0	0	0	0	0	1	0	0
mml-miR-449b-5p	0	2	0	0	0	0	0	0	0
mml-miR-516a-3p	0	0	0	0	0	0	0	0	0
mml-miR-523a	0	0	0	0	0	0	0	0	0
mml-miR-549b-3p	0	0	0	0	0	0	0	0	0
mml-miR-649	0	0	1	0	0	0	0	0	0
mml-miR-6129	0	0	0	0	0	0	0	0	0
mml-miR-363-5p	0	0	1	0	0	0	0	0	0
mml-miR-542-3p	0	0	0	0	0	0	0	0	1
mml-miR-595	0	0	0	0	0	0	0	1	0
mml-miR-7187-3p	0	0	0	0	0	0	1	0	0
mml-miR-518g-3p	0	0	0	0	0	1	1	0	0
mml-miR-576-5p	0	0	0	0	0	0	0	0	0
mml-miR-888	0	0	0	0	0	0	0	0	0
mml-miR-7171-5p	0	0	0	0	0	0	0	0	0
mml-miR-7204-5p	0	0	0	0	0	0	0	0	0
mml-miR-625	0	0	0	0	0	0	0	0	0
mml-miR-1241	0	0	0	0	0	0	0	0	0
mml-miR-146b-3p	0	0	1	0	0	0	1	0	0
mml-miR-208a-5p	0	0	0	0	0	0	0	0	0
mml-miR-3140	0	0	0	0	0	0	0	0	0
mml-miR-615-5p	0	1	0	0	0	0	0	0	0
mml-miR-7195-3p	0	0	0	1	0	0	0	0	0
mml-miR-500b-3p	0	1	0	0	0	0	0	0	0
mml-miR-511-5p	0	0	0	0	0	0	0	0	0
mml-miR-520a-3p	0	0	0	0	0	0	0	0	0
mml-miR-802	0	0	0	0	0	0	0	0	0
mml-miR-653-5p	0	0	0	0	0	0	0	0	0
mml-miR-345	0	0	0	0	0	0	0	0	0
mml-miR-675-5p	0	0	0	0	0	0	0	0	0
mml-miR-643	0	0	0	0	0	0	0	0	0
mml-miR-512-5p	0	0	0	0	1	0	0	0	0
mml-miR-4703-3p	0	0	0	0	0	0	0	0	0
mml-miR-7177-3p	0	0	0	0	0	0	1	0	0
mml-miR-196b-3p	0	0	0	0	1	0	0	0	0
mml-miR-188-3p	0	0	0	0	0	0	0	0	0
mml-miR-302a-5p	0	0	0	0	0	1	0	0	0
mml-miR-1247-3p	0	0	0	0	0	0	1	0	0
mml-miR-519a	0	0	0	0	0	0	0	0	0
mml-miR-519e	0	0	0	0	0	0	1	0	0
mml-miR-7183-3p	0	0	0	0	0	0	0	0	0
mml-miR-374b-3p	0	0	0	0	0	0	0	0	0
mml-miR-215-5p	0	0	0	0	0	0	0	0	0
mml-miR-553	0	0	0	0	0	0	0	0	0
mml-miR-31-3p	0	1	0	0	0	0	0	0	0
mml-miR-95-5p	0	0	0	0	0	0	0	0	0
mml-miR-7182-3p	0	0	0	0	0	0	0	0	0
mml-miR-20b-3p	0	0	0	0	0	0	0	0	1
mml-miR-765	0	0	0	0	0	0	0	0	1
mml-miR-153-1-5p	0	1	0	0	0	0	0	0	0
mml-miR-3122	0	0	0	0	0	0	0	0	1
mml-miR-7176-3p	0	0	0	0	0	0	0	0	0
mml-miR-200a-5p	0	0	1	0	0	0	0	0	0
mml-miR-548g-3p	0	0	0	0	0	0	0	0	0
mml-miR-200c-3p	0	0	0	0	0	0	0	0	1
mml-miR-1323-5p	0	0	0	0	0	0	0	0	0
mml-miR-1225-3p	0	0	0	0	0	0	1	0	0
mml-miR-7177-5p	0	0	1	0	0	0	0	0	0
mml-miR-1255a-3p	0	0	0	0	0	0	0	0	0
mml-miR-7167-3p	0	0	0	0	0	0	0	0	0
mml-miR-519a-5p	0	0	0	0	0	0	0	0	0
mml-miR-10b-3p	0	0	0	0	0	0	0	0	0
mml-miR-4677-3p	0	0	0	0	0	0	0	0	0
mml-miR-4796-5p	0	0	0	0	0	0	0	0	1
mml-miR-548g-5p	0	0	0	0	0	0	0	0	0
mml-miR-7194-5p	0	0	0	1	0	0	0	0	0
mml-miR-548d-3p	0	0	0	0	0	0	0	0	0
mml-miR-208b-5p	0	0	0	0	0	0	0	0	0
mml-miR-942-5p	0	0	0	0	0	0	0	0	0
mml-miR-208a-3p	0	0	0	0	1	0	0	0	0
mml-miR-518a-5p	0	0	0	0	0	0	0	0	0
mml-miR-378j	0	0	0	0	0	0	0	0	0
mml-miR-875-5p	0	0	0	0	0	0	0	0	0
mml-miR-616	0	0	0	0	0	0	0	0	0
mml-miR-492	0	0	0	0	0	0	0	0	0
mml-miR-548f	0	0	1	0	0	0	0	0	0
mml-miR-3167-5p	0	1	0	0	0	0	0	0	0
mml-miR-518c-5p	0	0	0	0	0	0	0	0	0
mml-miR-501-3p	0	1	0	0	0	0	0	0	0
mml-miR-7165-5p	0	0	1	0	0	0	0	0	0
mml-miR-7168-3p	0	0	0	0	0	0	0	0	0
mml-miR-612	0	0	0	0	0	0	0	0	0
mml-miR-877-3p	0	0	0	0	0	0	0	0	0
mml-miR-600	0	0	0	0	0	0	0	0	0
mml-miR-7179-3p	0	0	0	0	0	0	0	0	1
mml-miR-552	0	0	0	0	0	0	0	0	0
mml-miR-548i-3p	0	0	1	0	0	0	0	0	0
mml-miR-7178-3p	0	0	0	0	0	0	0	0	0
mml-miR-7208-5p	0	0	0	0	0	0	0	0	0
mml-miR-429-5p	0	0	0	0	0	0	0	0	0
mml-miR-412-3p	0	0	0	0	0	0	0	0	0
mml-miR-650b	0	0	0	0	0	0	0	0	0
mml-miR-7189-3p	0	0	1	0	0	0	0	0	0
mml-miR-7191-5p	0	0	0	0	1	0	0	0	0
mml-miR-449b-3p	0	0	0	0	0	0	0	0	0
mml-miR-6133	0	0	0	0	0	0	0	0	0
mml-miR-587	0	0	0	0	0	0	0	0	0
mml-miR-7196-5p	0	1	0	0	0	0	0	0	0
mml-miR-7167-5p	0	0	0	0	0	0	0	0	0
mml-miR-450a-2-3p	0	0	1	0	0	0	0	0	0
mml-miR-6132	0	0	0	0	0	0	0	0	0
mml-miR-152-5p	0	0	0	0	0	0	0	0	1
mml-miR-19a-5p	0	0	0	0	0	0	0	0	0
